# Supplementary material
Source: PubMed Central journal article supplement (PMC3946405)
Supplement: NIHMS531724-supplement-01.pdf [file NIHMS531724-supplement-01.pdf]

## SUPPLEMENTARY ONLINE CONTENT

eTable 1: Risk Factors Prioritized and Targeted by Intervention Communities.

eTable 2: Adjusted Odds Ratios for Cumulative Abstinence from Substance Use and Delinquency by Grade 12 among Baseline Non-Initiators Comparing Intervention to Control Communities.

eTable 3: Adjusted Odds Ratios for Cumulative Incidence of Substance Use and Violence by Grade 12 among Baseline Non-Initiators Comparing Intervention to Control Communities.

eTable 4: Adjusted Odds Ratios for Grade 12 Prevalence of Past-Month and Past-Year Substance Use, Delinquency, and Violence Comparing Intervention to Control Communities.

This supplementary material has been provided by the authors to give readers additional information for comparison with previous findings from the study.

**eTable 1. Risk Factors Prioritized and Targeted by Intervention Communities**

| Risk Factors                                        | Intervention Community |   |   |   |   |   |   |   |   |    |    |    |
|-----------------------------------------------------|------------------------|---|---|---|---|---|---|---|---|----|----|----|
|                                                     | 1                      | 2 | 3 | 4 | 5 | 6 | 7 | 8 | 9 | 10 | 11 | 12 |
| 1. Laws and norms favorable to drug use             |                        |   |   |   |   |   |   |   | x |    |    |    |
| 2. Low commitment to school                         |                        | x | x | x |   | x | x | x | x |    | x  | x  |
| 3. Academic failure                                 |                        |   |   | x | x |   |   | x |   | x  | x  |    |
| 4. Family conflict                                  | x                      | x |   |   |   |   | x |   |   |    |    |    |
| 5. Poor family management                           |                        |   | x | x |   |   |   |   |   | x  |    | x  |
| 6. Parental attitudes favorable to problem behavior |                        |   |   |   |   | x |   |   |   |    |    |    |
| 7. Antisocial friends                               | x                      | x |   |   | x |   |   |   | x | x  | x  | x  |
| 8. Peer rewards for antisocial behavior             | x                      |   |   |   |   |   | x |   |   |    |    |    |
| 9. Attitudes favorable to antisocial behavior       | x                      |   |   |   |   | x |   |   |   | x  |    |    |
| 10. Rebelliousness                                  | x                      |   |   |   |   |   |   | x | x |    |    |    |
| 11. Low perceived risk of drug use                  |                        |   |   |   |   |   |   | x |   |    |    | x  |
| Number of risk factors                              | 5                      | 3 | 2 | 3 | 2 | 3 | 3 | 4 | 4 | 4  | 3  | 4  |

**eTable 2. Adjusted Odds Ratios for Cumulative Abstinence from Substance Use and Delinquency by Grade 12 among Baseline Non-Initiators Comparing Intervention to Control Communities**

|                | AOR         | (95% CI)     |
|----------------|-------------|--------------|
| Any drugs      | <b>1.40</b> | (1.09, 1.81) |
| Gateway drugs  | 1.40        | (0.97, 2.01) |
| Alcohol        | <b>1.43</b> | (1.01, 2.04) |
| Cigarettes     | <b>1.25</b> | (1.00, 1.56) |
| Marijuana      | 1.15        | (0.90, 1.47) |
| Binge drinking | 1.23        | (0.91, 1.67) |
| Delinquency    | <b>1.29</b> | (1.03, 1.61) |

All figures represent averages across 40 imputed data sets.

AOR = adjusted odds ratio (in intervention versus control group) estimated using logistic regression and adjusted for student and community characteristics. Bolded AORs are statistically significant at  $p < .05$  (2-tailed).

**eTable 3. Adjusted Odds Ratios for Cumulative Incidence of Substance Use and Violence by Grade 12 among Baseline Non-Initiators Comparing Intervention to Control Communities**

|                                 | AOR         | (95% CI)     |
|---------------------------------|-------------|--------------|
| Smokeless tobacco               | 0.97        | (0.72, 1.30) |
| Inhalants                       | 0.97        | (0.74, 1.32) |
| Prescription drugs <sup>a</sup> | 0.97        | (0.81, 1.16) |
| Ecstasy (MDMA) <sup>a</sup>     | 1.22        | (0.84, 1.77) |
| Cocaine <sup>a</sup>            | 0.93        | (0.70, 1.24) |
| LSD <sup>a</sup>                | 1.17        | (0.90, 1.54) |
| Stimulants <sup>a</sup>         | 0.96        | (0.65, 1.41) |
| Other illegal drugs             | 1.10        | (0.84, 1.43) |
| Violence                        | <b>0.78</b> | (0.64, 0.94) |

All figures represent averages across 40 imputed data sets.

AOR = adjusted odds ratio (in intervention versus control group) estimated using logistic regression and adjusted for student and community characteristics. Bolded AORs are statistically significant at  $p < .05$  (2-tailed).

<sup>a</sup> At baseline (5th grade), respondents were asked if they had used any other illegal drugs beyond marijuana and inhalants. They were not asked specifically about the use of prescription drugs, ecstasy, cocaine, LSD, and stimulants. Analyses of these specific drugs in 12th grade were conducted among baseline non-initiators of other illegal drugs.

**eTable 4. Adjusted Odds Ratios for Grade 12 Prevalence of Past-Month and Past-Year Substance Use, Delinquency, and Violence Comparing Intervention to Control Communities**

|                       | AOR         | (95% CI)     |
|-----------------------|-------------|--------------|
| <b>Past-month use</b> |             |              |
| Any drugs             | 1.00        | (0.73; 1.36) |
| Gateway drugs         | 1.01        | (0.76; 1.35) |
| Alcohol               | 1.08        | (0.80; 1.46) |
| Cigarettes            | 0.91        | (0.70; 1.19) |
| Marijuana             | 1.13        | (0.91; 1.42) |
| Smokeless tobacco     | 0.80        | (0.61; 1.06) |
| Inhalants             | 1.39        | (0.75; 2.59) |
| Prescription drugs    | 1.49        | (0.98; 2.26) |
| LSD                   | 1.43        | (0.82; 2.50) |
| Cocaine               | 1.53        | (0.77; 3.03) |
| Stimulants            | 0.84        | (0.37; 1.89) |
| Ecstasy (MDMA)        | <b>1.92</b> | (1.10; 3.35) |
| Other illegal drugs   | 1.41        | (0.91; 2.21) |
| <b>Past 2 weeks</b>   |             |              |
| Binge drinking        | 0.93        | (0.67; 1.29) |
| <b>Past year</b>      |             |              |
| Gateway drug use      | 0.89        | (0.62; 1.26) |
| Alcohol use           | 0.96        | (0.68; 1.36) |
| Cigarette smoking     | 0.94        | (0.74; 1.20) |
| Marijuana use         | 1.00        | (0.84; 1.20) |
| Delinquency           | 1.03        | (0.87; 1.23) |
| Violence              | 0.96        | (0.75; 1.23) |

All figures represent averages across 40 imputed data sets.

AOR = adjusted odds ratio (intervention versus control group) estimated using logistic regression and adjusted for student and community characteristics. Bolded AORs are statistically significant at  $p < .05$  (2-tailed).
